# Supplementary material for: Near-Infrared MAO A Inhibitor (NMI) Outperformed FDA-Approved Chemotherapeutic Agents in Brain and Other Cancers: A Bioinformatic Analysis of NCI60 Screening Data
Source: MDPI journal article supplement (doi:10.3390/brainsci11101318), 2021-10-04
Supplement: s1 [file s1]

## Supplementary Data

|   |                                   |                                                                                                                    |                                                  |
|---|-----------------------------------|--------------------------------------------------------------------------------------------------------------------|--------------------------------------------------|
| A | <b>CNS Cancer</b>                 |                                                                                                                    |                                                  |
|   | <b>Drug</b>                       | <b>Indication</b>                                                                                                  | <b>Mechanism of Action</b>                       |
|   | Temozolomide                      | glioblastoma concomitantly with radiotherapy and refractory anaplastic astrocytoma                                 | DNA and RNA Alkylation                           |
|   | Lomustine                         | primary and metastatic brain tumors                                                                                | DNA and RNA Alkylation                           |
|   | Carmustine                        | brain tumors glioblastoma, brainstem glioma, medulloblastoma, astrocytoma, ependymoma, and metastatic brain tumors | DNA and RNA alkylation; Enzymatic Carbamoylation |
| B | Everolimus                        | subependymal giant cell astrocytoma (SEGA) that requires therapeutic intervention                                  | mTOR inhibitor; HIF inhibitor                    |
|   | <b>Prostate Cancer</b>            |                                                                                                                    |                                                  |
|   | <b>Drug</b>                       | <b>Indication</b>                                                                                                  | <b>Mechanism of Action</b>                       |
|   | Rucaparib                         | metastatic Castration-Resistant Prostate Cancer (mCRPC)                                                            | PARP Inhibitor                                   |
|   | Enzalutamide                      | mCRPC and metastatic Castration-Sensitive Prostate Cancer (mCSPC)                                                  | Androgen Receptor Inhibitor                      |
|   | Abiraterone Acetate               | mCRPC and mCSPC                                                                                                    | CYP17 Inhibitor                                  |
|   | <u>Cabazitaxel</u>                | mCRPC                                                                                                              | Antimicrotubular Antineoplastic Agent            |
|   | Docetaxel                         | mCRPC                                                                                                              | Antimicrotubular Antineoplastic Agent            |
|   | Leuprolide Acetate                | palliative treatment of advanced prostate cancer                                                                   | GnRH Agonist                                     |
|   | Mitoxantrone                      | advanced prostate cancer not responding to hormone treatment                                                       | Topoisomerase Inhibitor                          |
| C | Olaparib                          | mCRPC                                                                                                              | PARP Inhibitor                                   |
|   | <b>Non-Small Cell Lung Cancer</b> |                                                                                                                    |                                                  |
|   | <b>Drug</b>                       | <b>Indication</b>                                                                                                  | <b>Mechanism of Action</b>                       |
|   | Alectinib                         | ALK-positive metastatic NSCLC                                                                                      | ALK and RET Inhibitor                            |
|   | Pemetrexed                        | locally advanced or metastatic, non-squamous NSCLC                                                                 | Antimetabolite                                   |
|   | Carboplatin                       | chemotherapeutic treatment for NSCLC                                                                               | Alkylating Agent                                 |
|   | Crizotinib                        | ALK or ROS1-positive metastatic NSCLC                                                                              | ALK and ROS1 Inhibitor                           |
|   | Docetaxel                         | locally advanced or metastatic NSCLC after failure of prior platinum-based chemotherapy                            | Taxoid                                           |
|   | Doxorubicin                       | chemotherapeutic treatment for NSCLC                                                                               | Anthracycline Antibiotic                         |
|   | Erlotinib                         | EGFR gene mutated metastatic NSCLC                                                                                 | EGFR Tyrosine Kinase Inhibitor                   |
|   | Everolimus                        | unresectable, locally advanced, or metastatic NSCLC                                                                | mTOR Kinase Inhibitor                            |
|   | Gefitinib                         | EGFR gene mutated metastatic NSCLC; in combination with Everolimus                                                 | EGFR Tyrosine Kinase Inhibitor                   |
|   | Lorlatinib                        | ALK-positive metastatic NSCLC                                                                                      | ALK and ROS1 Inhibitor                           |
|   | Mechlorethamine                   | NSCLC                                                                                                              | Alkylating Agent                                 |
|   | Trametinib                        | in combination with dabrafenib for BRAF V600E mutated metastatic NSCLC                                             | MEK Kinase Inhibitor                             |
|   | Methotrexate                      | NSCLC                                                                                                              | Folate Analog Metabolic Inhibitor                |
|   | Paclitaxel                        | chemotherapeutic treatment for NSCLC                                                                               | Taxane; Plant Alkaloid                           |
|   | Vinorelbine                       | alone or in combination with Cisplatin for locally advanced or metastatic NSCLC                                    | Plant Alkaloid                                   |

**Table S1** The indication and mechanism of FDA-approved anticancer drugs for (A) CNS cancer, (B) prostate cancer (C) NSCLC. Literature review of indication, mechanism of FDA-approved CNS, prostate, NSCLC cancers.

A

|                       | Cell Lines | NMI                                                                                                     | Temozolomide | Lomustine | Carmustine | Everolimus | Max                                 | Min    | Max-Min |
|-----------------------|------------|---------------------------------------------------------------------------------------------------------|--------------|-----------|------------|------------|-------------------------------------|--------|---------|
| GI50 (µM)             | SF-268     | 1.820                                                                                                   | 100.000      | 20.900    | 31.600     | 0.269      | 100.000                             | 0.269  | 99.731  |
| Min-max normalization |            | 0.016                                                                                                   | 1.000        | 0.207     | 0.314      | 0.000      | (GI50 - Min) / (Max - Min)          |        |         |
|                       |            | e.g. Min-max normalization of GI50 of NMI: (1.820-0.269)/99.731=0.016                                   |              |           |            |            |                                     |        |         |
| GI50 (µM)             | SF-295     | 1.910                                                                                                   | 100.000      | 91.200    | 39.800     | 0.010      | 100.000                             | 0.010  | 99.990  |
| Min-max normalization |            | 0.019                                                                                                   | 1.000        | 0.912     | 0.398      | 0.000      | (GI50 - Min) / (Max - Min)          |        |         |
| GI50 (µM)             | SF-539     | 1.200                                                                                                   | 100.000      | 16.600    | 31.600     | 0.010      | 100.000                             | 0.010  | 99.990  |
| Min-max normalization |            | 0.012                                                                                                   | 1.000        | 0.166     | 0.316      | 0.000      | (GI50 - Min) / (Max - Min)          |        |         |
| GI50 (µM)             | SNB-19     | 1.120                                                                                                   | 100.000      | 100.000   | 63.100     | 0.257      | 100.000                             | 0.257  | 99.743  |
| Min-max normalization |            | 0.009                                                                                                   | 1.000        | 1.000     | 0.630      | 0.000      | (GI50 - Min) / (Max - Min)          |        |         |
| GI50 (µM)             | SNB-75     | 1.290                                                                                                   | 63.000       | 23.400    | 50.100     | 0.010      | 63.000                              | 0.010  | 62.990  |
| Min-max normalization |            | 0.020                                                                                                   | 1.000        | 0.371     | 0.795      | 0.000      | (GI50 - Min) / (Max - Min)          |        |         |
| GI50 (µM)             | U251       | 0.740                                                                                                   | 100.000      | 15.800    | 31.600     | 0.011      | 100.000                             | 0.011  | 99.989  |
| Min-max normalization |            | 0.007                                                                                                   | 1.000        | 0.158     | 0.316      | 0.000      | (GI50 - Min) / (Max - Min)          |        |         |
| TGI (µM)              | SF-268     | 6.760                                                                                                   | 100.000      | 57.500    | 100.000    | 20.900     | 100.000                             | 6.760  | 93.240  |
| Min-max normalization |            | 0.000                                                                                                   | 1.000        | 0.544     | 1.000      | 0.152      | (TGI - Min) / (Max - Min)           |        |         |
| TGI (µM)              | SF-295     | 4.070                                                                                                   | 100.000      | 100.000   | 251.000    | 17.300     | 251.000                             | 4.070  | 246.930 |
| Min-max normalization |            | 0.000                                                                                                   | 0.388        | 0.388     | 1.000      | 0.054      | (TGI - Min) / (Max - Min)           |        |         |
| TGI (µM)              | SF-539     | 2.690                                                                                                   | 100.000      | 33.900    | 100.000    | 17.300     | 100.000                             | 2.690  | 97.310  |
| Min-max normalization |            | 0.000                                                                                                   | 1.000        | 0.321     | 1.000      | 0.150      | (TGI - Min) / (Max - Min)           |        |         |
| TGI (µM)              | SNB-19     | 3.630                                                                                                   | 100.000      | 100.000   | 251.000    | 19.500     | 251.000                             | 3.630  | 247.370 |
| Min-max normalization |            | 0.000                                                                                                   | 0.390        | 0.390     | 1.000      | 0.064      | (TGI - Min) / (Max - Min)           |        |         |
| TGI (µM)              | SNB-75     | 3.890                                                                                                   | 100.000      | 64.600    | 126.000    | 14.100     | 126.000                             | 3.890  | 122.110 |
| Min-max normalization |            | 0.000                                                                                                   | 0.787        | 0.497     | 1.000      | 0.084      | (TGI - Min) / (Max - Min)           |        |         |
| TGI (µM)              | U251       | 2.090                                                                                                   | 100.000      | 51.300    | 63.100     | 18.200     | 100.000                             | 2.090  | 97.910  |
| Min-max normalization |            | 0.000                                                                                                   | 1.000        | 0.503     | 0.623      | 0.165      | (TGI - Min) / (Max - Min)           |        |         |
| LC50 (µM)             | SF-268     | 100.000                                                                                                 | 100.000      | 100.000   | 251.000    | 53.700     | 251.000                             | 53.700 | 197.300 |
| Min-max normalization |            | 0.235                                                                                                   | 0.235        | 0.235     | 1.000      | 0.000      | (LC50 - Min) / (Max - Min)          |        |         |
| LC50 (µM)             | SF-295     | 8.710                                                                                                   | 100.000      | 100.000   | 251.000    | 63.100     | 251.000                             | 8.710  | 242.290 |
| Min-max normalization |            | 0.000                                                                                                   | 0.377        | 0.377     | 1.000      | 0.224      | (LC50 - Min) / (Max - Min)          |        |         |
| LC50 (µM)             | SF-539     | 6.030                                                                                                   | 100.000      | 70.800    | 251.000    | 41.700     | 251.000                             | 6.030  | 244.970 |
| Min-max normalization |            | 0.000                                                                                                   | 0.384        | 0.264     | 1.000      | 0.146      | (LC50 - Min) / (Max - Min)          |        |         |
| LC50 (µM)             | SNB-19     | 28.200                                                                                                  | 100.000      | 100.000   | 251.000    | 44.700     | 251.000                             | 28.200 | 222.800 |
| Min-max normalization |            | 0.000                                                                                                   | 0.322        | 0.322     | 1.000      | 0.074      | (LC50 - Min) / (Max - Min)          |        |         |
| LC50 (µM)             | SNB-75     | 13.800                                                                                                  | 100.000      | 100.000   | 251.000    | 38.900     | 251.000                             | 13.800 | 237.200 |
| Min-max normalization |            | 0.000                                                                                                   | 0.363        | 0.363     | 1.000      | 0.106      | (LC50 - Min) / (Max - Min)          |        |         |
| LC50 (µM)             | U251       | 5.010                                                                                                   | 100.000      | 100.000   | 126.000    | 42.700     | 126.000                             | 5.010  | 120.990 |
| Min-max normalization |            | 0.000                                                                                                   | 0.785        | 0.785     | 1.000      | 0.312      | (LC50 - Min) / (Max - Min)          |        |         |
| Cumulative Score      | SF-268     | 0.250                                                                                                   | 2.235        | 0.986     | 2.314      | 0.152      | GI50+TGI+LC50 Min-max normalization |        |         |
|                       | SF-295     | 0.019                                                                                                   | 1.765        | 1.677     | 2.398      | 0.278      |                                     |        |         |
|                       | SF-539     | 0.012                                                                                                   | 2.384        | 0.751     | 2.316      | 0.296      |                                     |        |         |
|                       | SNB-19     | 0.009                                                                                                   | 1.712        | 1.712     | 2.630      | 0.138      |                                     |        |         |
|                       | SNB-75     | 0.020                                                                                                   | 2.150        | 1.232     | 2.795      | 0.189      |                                     |        |         |
|                       | U251       | 0.007                                                                                                   | 2.785        | 1.446     | 1.939      | 0.476      |                                     |        |         |
|                       |            | e.g. Cumulative score of min-max normalization of GI50, TGI and LC50 of NMI:<br>0.016+0.000+0.235=0.250 |              |           |            |            |                                     |        |         |

B

|                       | Cell Lines | NMI                                                                                                  | Rucaparib | Enzastamide | Abiraterone Acetate | Cabazitaxel | Docetaxel | Leuprolide Acetate | Mitoxantrone | Olaparib | Max                                 | Min    | Max-Min |
|-----------------------|------------|------------------------------------------------------------------------------------------------------|-----------|-------------|---------------------|-------------|-----------|--------------------|--------------|----------|-------------------------------------|--------|---------|
| GI50 (µM)             | PC-3       | 1.700                                                                                                | 23.400    | 20.000      | 3.980               | 0.010       | 0.010     | 100.000            | 0.141        | 51.286   | 100.000                             | 0.010  | 99.990  |
| Min-max normalization |            | 0.017                                                                                                | 0.234     | 0.200       | 0.040               | 0.000       | 0.000     | 1.000              | 0.001        | 0.513    | (GI50 - Min) / (Max - Min)          |        |         |
|                       |            | e.g. Min-max normalization of GI50 of NMI: (1.700-0.010)/99.99=0.017                                 |           |             |                     |             |           |                    |              |          |                                     |        |         |
| GI50 (µM)             | DU-145     | 3.020                                                                                                | 18.200    | 31.800      | 20.000              | 0.010       | 0.010     | 100.000            | 0.018        | 100.000  | 100.000                             | 0.010  | 99.990  |
| Min-max normalization |            | 0.030                                                                                                | 0.182     | 0.316       | 0.200               | 0.000       | 0.000     | 1.000              | 0.000        | 1.000    | (GI50 - Min) / (Max - Min)          |        |         |
| TGI (µM)              | PC-3       | 3.980                                                                                                | 100.000   | 100.000     | 100.000             | 79.400      | 100.000   | 100.000            | 1.445        | 100.000  | 100.000                             | 1.445  | 98.555  |
| Min-max normalization |            | 0.026                                                                                                | 1.000     | 1.000       | 1.000               | 0.791       | 1.000     | 1.000              | 0.000        | 1.000    | (TGI - Min) / (Max - Min)           |        |         |
| TGI (µM)              | DU-145     | 11.000                                                                                               | 36.300    | 100.000     | 100.000             | 0.010       | 77.625    | 100.000            | 0.468        | 100.000  | 100.000                             | 0.010  | 99.990  |
| Min-max normalization |            | 0.110                                                                                                | 0.363     | 1.000       | 1.000               | 0.000       | 0.776     | 1.000              | 0.005        | 1.000    | (TGI - Min) / (Max - Min)           |        |         |
| LC50 (µM)             | PC-3       | 9.550                                                                                                | 100.000   | 100.000     | 100.000             | 100.000     | 100.000   | 100.000            | 10.471       | 100.000  | 100.000                             | 9.550  | 90.450  |
| Min-max normalization |            | 0.000                                                                                                | 1.000     | 1.000       | 1.000               | 1.000       | 1.000     | 1.000              | 0.010        | 1.000    | (LC50 - Min) / (Max - Min)          |        |         |
| LC50 (µM)             | DU-145     | 34.700                                                                                               | 72.400    | 100.000     | 100.000             | 100.000     | 100.000   | 100.000            | 11.482       | 100.000  | 100.000                             | 11.482 | 88.518  |
| Min-max normalization |            | 0.262                                                                                                | 0.888     | 1.000       | 1.000               | 1.000       | 1.000     | 1.000              | 0.000        | 1.000    | (LC50 - Min) / (Max - Min)          |        |         |
| Cumulative Score      | PC-3       | 0.043                                                                                                | 2.234     | 2.200       | 2.040               | 1.791       | 2.000     | 3.000              | 0.011        | 2.513    | GI50+TGI+LC50 Min-max normalization |        |         |
|                       | DU-145     | 0.402                                                                                                | 1.233     | 2.316       | 2.200               | 1.000       | 1.776     | 3.000              | 0.005        | 3.000    |                                     |        |         |
|                       |            | e.g. Cumulative score of min-max normalization of GI50, TGI and LC50 of NMI: 0.017+0.026+0.000+0.043 |           |             |                     |             |           |                    |              |          |                                     |        |         |

(Continued)

(Continued)

C

| Cell Line                                                                      | NMI     | Griseofulvin | Trametinib | Alectinib | Pembrolizumab | Carboplatin | Cisplatin | Doxorubicin | Doxorubicin | Etoposide | Gefitinib | Lorazepam | Mechlorethamine | Methotrexate | Paclitaxel | Vincristine | Max                       | Min                       | Max-Min |  |
|--------------------------------------------------------------------------------|---------|--------------|------------|-----------|---------------|-------------|-----------|-------------|-------------|-----------|-----------|-----------|-----------------|--------------|------------|-------------|---------------------------|---------------------------|---------|--|
| G50 (µM)                                                                       | 3.220   | 9.120        | 0.030      | 1.350     | 0.590         | 100.000     | 1.170     | 0.010       | 0.063       | 0.010     | 1.590     | 25.119    | 2.818           | 0.010        | 0.011      | 0.019       | 100.000                   | 0.010                     | 99.990  |  |
| Min-max normalization                                                          | 0.032   | 0.091        | 0.000      | 0.013     | 0.006         | 1.000       | 0.012     | 0.000       | 0.001       | 0.000     | 0.016     | 0.251     | 0.028           | 0.000        | 0.000      | 0.000       | (Min - Max) / (Max - Min) |                           |         |  |
| e.g. Min-max normalization of G50 of NMI: $(3.220 - 0.010) / (99.990 - 0.032)$ |         |              |            |           |               |             |           |             |             |           |           |           |                 |              |            |             |                           |                           |         |  |
| G50 (µM)                                                                       | 2.420   | 0.191        | 0.013      | 1.550     | 100.000       | 100.000     | 5.130     | 3.720       | 0.420       | 0.010     | 0.045     | 16.218    | 6.026           | 10.000       | 0.917      | 0.010       | 100.000                   | 0.010                     | 99.990  |  |
| Min-max normalization                                                          | 0.024   | 0.002        | 0.000      | 0.015     | 1.000         | 1.000       | 0.051     | 0.037       | 0.004       | 0.000     | 0.000     | 0.162     | 0.060           | 0.100        | 0.010      | 0.000       | (Min - Max) / (Max - Min) |                           |         |  |
| G50 (µM)                                                                       | 2.100   | 15.100       | 0.251      | 0.950     | 0.720         | 100.000     | 1.910     | 0.010       | 0.065       | 0.010     | 10.200    | 22.909    | 5.245           | 0.016        | 0.031      | 0.015       | 100.000                   | 0.010                     | 99.990  |  |
| Min-max normalization                                                          | 0.021   | 0.151        | 0.002      | 0.005     | 0.007         | 1.000       | 0.019     | 0.000       | 0.001       | 0.000     | 0.102     | 0.229     | 0.052           | 0.000        | 0.000      | 0.000       | (Min - Max) / (Max - Min) |                           |         |  |
| G50 (µM)                                                                       | 1.570   | 4.270        | 0.010      | 0.390     | 100.000       | 100.000     | 0.560     | 9.120       | 0.100       | 0.020     | 1.410     | 2.512     | 0.372           | 1.943        | 0.525      | 0.047       | 100.000                   | 0.010                     | 99.990  |  |
| Min-max normalization                                                          | 0.016   | 0.043        | 0.000      | 0.004     | 1.000         | 1.000       | 0.006     | 0.091       | 0.001       | 0.000     | 0.014     | 0.025     | 0.004           | 0.019        | 0.005      | 0.000       | (Min - Max) / (Max - Min) |                           |         |  |
| G50 (µM)                                                                       | 1.720   | 42.700       | 4.370      | 1.740     | 100.000       | 100.000     | 1.820     | 0.360       | 0.050       | 0.350     | 15.500    | 40.738    | 0.318           | 2.344        | 1.047      | 0.030       | 100.000                   | 0.030                     | 99.970  |  |
| Min-max normalization                                                          | 0.011   | 0.427        | 0.043      | 0.017     | 1.000         | 1.000       | 0.018     | 0.003       | 0.000       | 0.003     | 0.155     | 0.407     | 0.003           | 0.023        | 0.010      | 0.000       | (Min - Max) / (Max - Min) |                           |         |  |
| G50 (µM)                                                                       | 1.940   | 28.200       | 0.010      | 2.820     | 100.000       | 100.000     | 2.590     | 0.010       | 0.160       | 0.320     | 17.000    | 59.894    | 1.318           | 0.097        | 0.012      | 0.019       | 100.000                   | 0.010                     | 99.990  |  |
| Min-max normalization                                                          | 0.019   | 0.282        | 0.000      | 0.028     | 1.000         | 1.000       | 0.021     | 0.000       | 0.001       | 0.003     | 0.170     | 0.589     | 0.013           | 0.001        | 0.000      | 0.000       | (Min - Max) / (Max - Min) |                           |         |  |
| G50 (µM)                                                                       | 3.010   | 0.095        | 0.012      | 2.340     | 100.000       | 100.000     | 5.290     | 0.010       | 0.540       | 0.220     | 0.095     | 33.213    | 15.949          | 0.427        | 0.009      | 0.010       | 100.000                   | 0.009                     | 99.991  |  |
| Min-max normalization                                                          | 0.030   | 0.001        | 0.000      | 0.023     | 1.000         | 1.000       | 0.052     | 0.000       | 0.005       | 0.002     | 0.001     | 0.331     | 0.159           | 0.004        | 0.000      | 0.000       | (Min - Max) / (Max - Min) |                           |         |  |
| G50 (µM)                                                                       | 1.770   | 5.930        | 3.165      | 1.480     | 0.250         | 100.000     | 0.930     | 0.010       | 0.017       | 0.150     | 6.610     | 25.184    | 0.129           | 0.006        | 0.007      | 0.010       | 100.000                   | 0.006                     | 99.995  |  |
| Min-max normalization                                                          | 0.018   | 0.059        | 0.032      | 0.015     | 0.003         | 1.000       | 0.009     | 0.000       | 0.000       | 0.001     | 0.066     | 0.282     | 0.001           | 0.000        | 0.000      | 0.000       | (Min - Max) / (Max - Min) |                           |         |  |
| G50 (µM)                                                                       | 1.160   | 0.955        | 3.800      | 1.170     | 19.200        | 100.000     | 1.510     | 0.010       | 0.029       | 0.160     | 6.760     | 57.544    | 0.871           | 1.445        | 0.004      | 0.000       | 100.000                   | 0.004                     | 99.996  |  |
| Min-max normalization                                                          | 0.012   | 0.010        | 0.039      | 0.012     | 0.182         | 1.000       | 0.015     | 0.000       | 0.000       | 0.002     | 0.068     | 0.575     | 0.009           | 0.014        | 0.000      | 0.000       | (Min - Max) / (Max - Min) |                           |         |  |
| TGI (µM)                                                                       | 13.200  | 100.000      | 43.700     | 3.090     | 100.000       | 100.000     | 11.200    | 81.300      | 0.290       | 22.400    | 21.900    | 100.000   | 32.359          | 10.000       | 70.195     | 33.894      | 100.000                   | 0.290                     | 99.710  |  |
| Min-max normalization                                                          | 0.129   | 1.000        | 0.435      | 0.028     | 1.000         | 1.000       | 0.109     | 0.813       | 0.000       | 0.222     | 0.217     | 1.000     | 0.322           | 0.097        | 0.707      | 0.337       | (Min - Max) / (Max - Min) |                           |         |  |
| TGI (µM)                                                                       | 12.800  | 100.000      | 69.200     | 5.920     | 100.000       | 100.000     | 19.200    | 60.000      | 5.500       | 21.400    | 17.400    | 100.000   | 25.303          | 10.000       | 85.114     | 19.621      | 100.000                   | 5.500                     | 94.500  |  |
| Min-max normalization                                                          | 0.071   | 1.000        | 0.591      | 0.015     | 1.000         | 1.000       | 0.134     | 1.000       | 0.000       | 0.165     | 0.126     | 1.000     | 0.230           | 0.045        | 0.843      | 0.139       | (Min - Max) / (Max - Min) |                           |         |  |
| TGI (µM)                                                                       | 57.200  | 96.200       | 51.200     | 2.670     | 100.000       | 100.000     | 7.590     | 3.900       | 2.000       | 22.400    | 35.500    | 100.000   | 31.623          | 5.495        | 39.811     | 24.547      | 100.000                   | 2.000                     | 98.000  |  |
| Min-max normalization                                                          | 0.035   | 0.553        | 0.503      | 0.006     | 1.000         | 1.000       | 0.097     | 0.018       | 0.000       | 0.208     | 0.342     | 1.000     | 0.302           | 0.036        | 0.386      | 0.230       | (Min - Max) / (Max - Min) |                           |         |  |
| TGI (µM)                                                                       | 3.530   | 61.700       | 0.010      | 3.550     | 100.000       | 100.000     | 0.370     | 56.200      | 2.000       | 20.000    | 23.400    | 53.703    | 3.162           | 10.000       | 61.660     | 0.550       | 100.000                   | 0.010                     | 99.990  |  |
| Min-max normalization                                                          | 0.035   | 0.617        | 0.000      | 0.035     | 1.000         | 1.000       | 0.033     | 0.562       | 0.020       | 0.200     | 0.234     | 0.537     | 0.032           | 0.100        | 0.617      | 0.005       | (Min - Max) / (Max - Min) |                           |         |  |
| TGI (µM)                                                                       | 4.110   | 100.000      | 47.300     | 4.370     | 100.000       | 100.000     | 7.240     | 63.100      | 0.260       | 23.400    | 33.100    | 100.000   | 39.811          | 10.000       | 19.055     | 36.308      | 100.000                   | 0.260                     | 99.740  |  |
| Min-max normalization                                                          | 0.039   | 1.000        | 0.473      | 0.041     | 1.000         | 1.000       | 0.070     | 0.630       | 0.000       | 0.232     | 0.329     | 1.000     | 0.397           | 0.098        | 0.189      | 0.361       | (Min - Max) / (Max - Min) |                           |         |  |
| TGI (µM)                                                                       | 5.590   | 100.000      | 19.500     | 39.200    | 100.000       | 100.000     | 15.500    | 75.900      | 0.910       | 22.900    | 46.800    | 100.000   | 5.511           | 10.000       | 72.444     | 41.697      | 100.000                   | 0.910                     | 99.090  |  |
| Min-max normalization                                                          | 0.042   | 1.000        | 0.195      | 0.393     | 1.000         | 1.000       | 0.147     | 0.759       | 0.000       | 0.222     | 0.463     | 1.000     | 0.097           | 0.092        | 0.722      | 0.412       | (Min - Max) / (Max - Min) |                           |         |  |
| TGI (µM)                                                                       | 10.500  | 19.900       | 47.900     | 10.470    | 100.000       | 100.000     | 15.600    | 93.300      | 5.010       | 0.490     | 17.000    | 100.000   | 45.709          | 10.000       | 79.433     | 25.704      | 100.000                   | 0.490                     | 99.510  |  |
| Min-max normalization                                                          | 0.105   | 0.134        | 0.475      | 0.100     | 1.000         | 1.000       | 0.182     | 0.933       | 0.046       | 0.000     | 0.166     | 1.000     | 0.454           | 0.096        | 0.793      | 0.253       | (Min - Max) / (Max - Min) |                           |         |  |
| TGI (µM)                                                                       | 5.010   | 91.200       | 93.300     | 4.070     | 100.000       | 100.000     | 5.620     | 40.700      | 1.290       | 19.500    | 20.000    | 100.000   | 2.754           | 10.000       | 40.738     | 0.447       | 100.000                   | 0.447                     | 99.553  |  |
| Min-max normalization                                                          | 0.046   | 0.912        | 0.933      | 0.036     | 1.000         | 1.000       | 0.052     | 0.404       | 0.008       | 0.191     | 0.196     | 1.000     | 0.023           | 0.096        | 0.405      | 0.000       | (Min - Max) / (Max - Min) |                           |         |  |
| TGI (µM)                                                                       | 3.340   | 22.400       | 21.900     | 3.800     | 100.000       | 100.000     | 4.170     | 0.100       | 0.160       | 17.800    | 39.900    | 100.000   | 2.399           | 10.000       | 0.036      | 31.623      | 100.000                   | 0.036                     | 99.964  |  |
| Min-max normalization                                                          | 0.033   | 0.224        | 0.219      | 0.038     | 1.000         | 1.000       | 0.041     | 0.001       | 0.001       | 0.178     | 0.389     | 1.000     | 0.024           | 0.100        | 0.000      | 0.316       | (Min - Max) / (Max - Min) |                           |         |  |
| LC50 (µM)                                                                      | 38.300  | 100.000      | 89.100     | 6.920     | 100.000       | 100.000     | 36.300    | 100.000     | 100.000     | 70.800    | 46.800    | 100.000   | 100.000         | 10.000       | 91.201     | 66.059      | 100.000                   | 6.920                     | 93.080  |  |
| Min-max normalization                                                          | 0.344   | 1.000        | 0.891      | 0.060     | 1.000         | 1.000       | 0.316     | 1.000       | 1.000       | 0.639     | 0.428     | 1.000     | 1.000           | 0.093        | 0.905      | 0.660       | (Min - Max) / (Max - Min) |                           |         |  |
| LC50 (µM)                                                                      | 100.000 | 100.000      | 100.000    | 100.000   | 100.000       | 100.000     | 43.700    | 100.000     | 47.900      | 85.100    | 51.300    | 100.000   | 83.175          | 10.000       | 100.000    | 63.096      | 100.000                   | 10.000                    | 90.000  |  |
| Min-max normalization                                                          | 1.000   | 1.000        | 1.000      | 1.000     | 1.000         | 1.000       | 0.374     | 1.000       | 0.421       | 0.834     | 0.459     | 1.000     | 0.813           | 0.000        | 1.000      | 0.590       | (Min - Max) / (Max - Min) |                           |         |  |
| LC50 (µM)                                                                      | 22.800  | 100.000      | 100.000    | 6.460     | 100.000       | 100.000     | 28.800    | 93.300      | 67.600      | 55.000    | 74.100    | 100.000   | 100.000         | 10.000       | 85.114     | 85.114      | 100.000                   | 6.460                     | 93.540  |  |
| Min-max normalization                                                          | 0.171   | 1.000        | 1.000      | 0.000     | 1.000         | 1.000       | 0.239     | 0.928       | 0.654       | 0.519     | 0.723     | 1.000     | 1.000           | 0.038        | 0.841      | 0.841       | (Min - Max) / (Max - Min) |                           |         |  |
| LC50 (µM)                                                                      | 7.890   | 100.000      | 43.700     | 40.700    | 100.000       | 100.000     | 17.700    | 100.000     | 42.700      | 53.700    | 49.000    | 100.000   | 21.878          | 10.000       | 100.000    | 42.658      | 100.000                   | 7.890                     | 92.110  |  |
| Min-max normalization                                                          | 0.000   | 1.000        | 0.389      | 0.356     | 1.000         | 1.000       | 0.107     | 1.000       | 0.378       | 0.497     | 0.446     | 1.000     | 0.152           | 0.023        | 1.000      | 0.277       | (Min - Max) / (Max - Min) |                           |         |  |
| LC50 (µM)                                                                      | 9.850   | 100.000      | 100.000    | 14.500    | 100.000       | 100.000     | 20.900    | 100.000     | 6.460       | 64.600    | 70.800    | 100.000   | 100.000         | 10.000       | 81.283     | 81.283      | 100.000                   | 14.500                    | 93.500  |  |
| Min-max normalization                                                          | 0.036   | 1.000        | 1.000      | 0.086     | 1.000         | 1.000       | 0.154     | 1.000       | 0.000       | 0.058     | 0.622     | 0.688     | 1.000           | 1.000        | 0.038      | 0.800       | 0.036                     | (Min - Max) / (Max - Min) |         |  |
| LC50 (µM)                                                                      | 100.000 | 100.000      | 100.000    | 100.000   | 100.000       | 100.000     | 46.800    | 100.000     | 13.100      | 55.200    | 95.500    | 100.000   | 43.652          | 10.000       | 95.499     | 100.000     | 10.000                    | 90.000                    | 90.000  |  |
| Min-max normalization                                                          | 1.000   | 1.000        | 1.000      | 1.000     | 1.000         | 1.000       | 0.409     | 1.000       | 0.035       | 0.513     | 0.950     | 1.000     | 0.374           | 0.000        | 0.950      | 1.000       | (Min - Max) / (Max - Min) |                           |         |  |
| LC50 (µM)                                                                      | 39.000  | 75.900       | 100.000    | 91.200    | 100.000       | 100.000     | 46.800    | 100.000     | 67.600      | 39.900    | 59.900    | 100.000   | 100.000         | 10.000       | 100.000    | 69.183      | 100.000                   | 10.000                    | 90.000  |  |
| Min-max normalization                                                          | 0.328   | 0.732        | 1.000      | 0.902     | 1.000         | 1.000       | 0.409     | 1.000       | 0.640       | 0.331     | 0.543     | 1.000     | 1.000           | 0.000        | 1.000      | 0.658       | (Min - Max) / (Max - Min) |                           |         |  |
| LC50 (µM)                                                                      | 47.100  | 100.000      | 100.000    | 12.000    | 100.000       | 100.000     | 21.500    | 100.000     | 51.300      | 50.100    | 45.700    | 100.000   | 22.909          | 10.000       | 93.326     | 36.481      | 100.000                   | 10.000                    | 90.000  |  |
| Min-max normalization                                                          | 0.412   | 1.000        | 1.000      | 0.022     | 1.000         | 1.000       | 0.194     | 1.000       | 0.459       | 0.446     | 0.397     | 1.000     | 0.143           | 0.000        | 0.926      | 0.283       | (Min - Max) / (Max - Min) |                           |         |  |
| LC50 (µM)                                                                      | 9.660   | 97.700       | 100.000    | 28.800    | 100.000       | 100.000     | 12.600    | 85.100      | 2.820       | 47.900    | 87.100    | 100.000   | 6.026           | 10.000       | 74.131     | 107.956     | 100.000                   | 2.820                     | 97.180  |  |
| Min-max normalization                                                          | 0.070   | 0.976        | 1.000      | 0.267     | 1.000         | 1.000       | 0.101     | 0.847       | 0.000       | 0.464     | 0.867     | 1.000     | 0.033           | 0.074        | 0.734      | 0.699       |                           |                           |         |  |

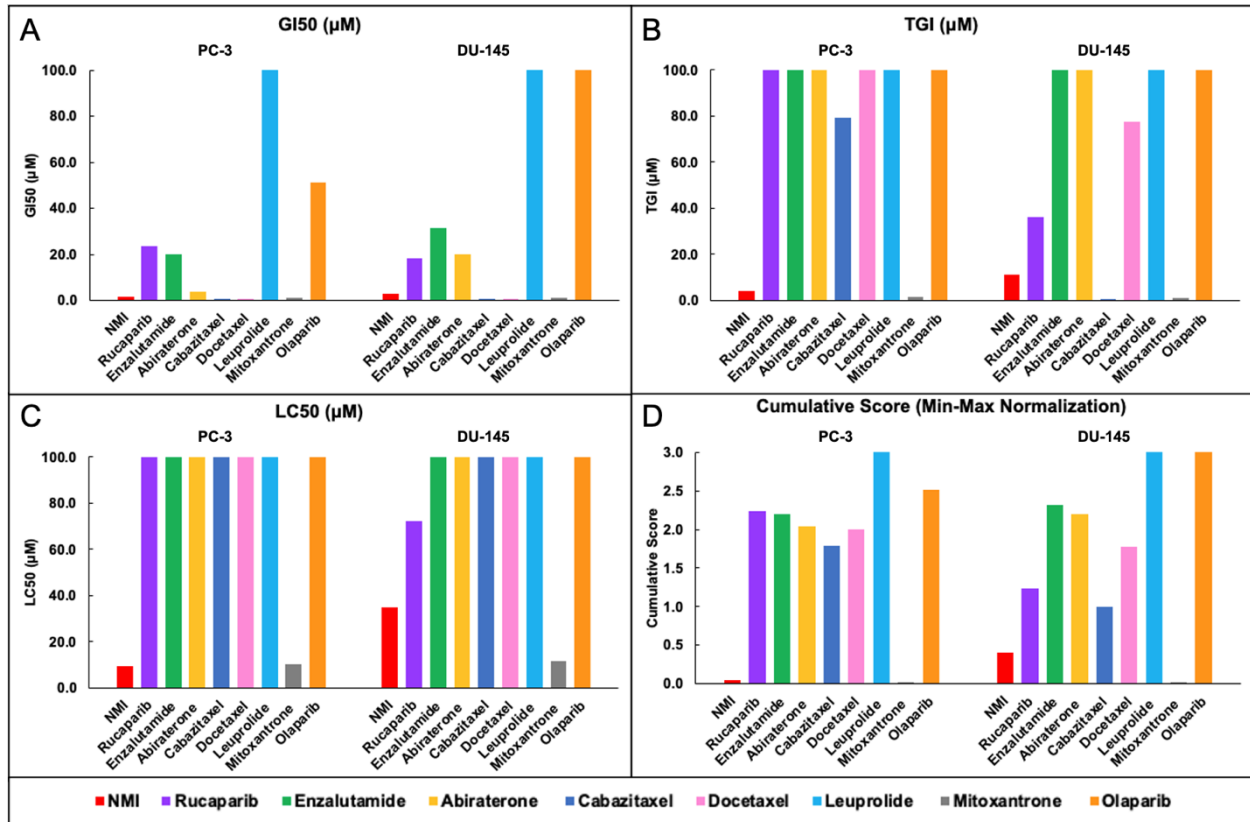

**Figure S1** The comparison of (A)GI<sub>50</sub>, (B)TGI, (C) LC<sub>50</sub>, (D)cumulative score of NMI to FDA-approved prostate cancer drugs. NMI shows higher potency to prostate cancer cell lines than most FDA-approved prostate cancer drugs. Y-axis indicates concentration of GI<sub>50</sub>, TGI, LC<sub>50</sub> (0  $\mu\text{M}$  to 100  $\mu\text{M}$ ), and cumulative score (0.0 to 3.0). Drugs are color-coded: NMI (red); Rucaparib (purple), Enzalutamide (green), Abiraterone (yellow), Cabazitaxel (blue), Docetaxel (pink), Leuprolide (cyan), Mitoxantrone (grey), and Olaparib (orange).

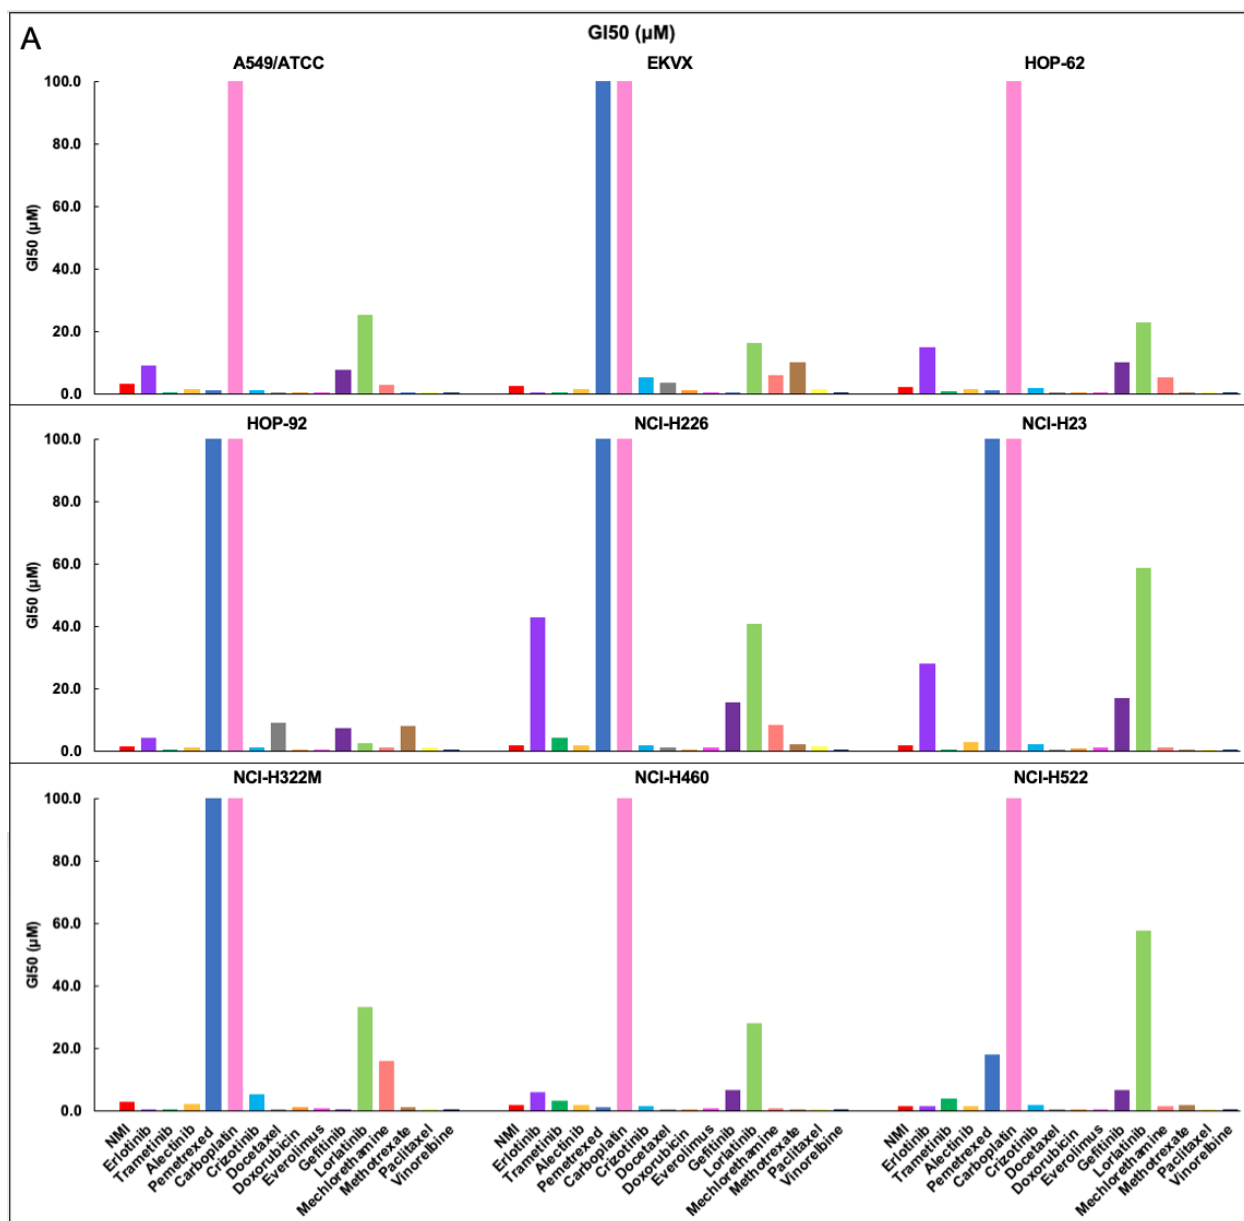

(Continued)

(Continued)

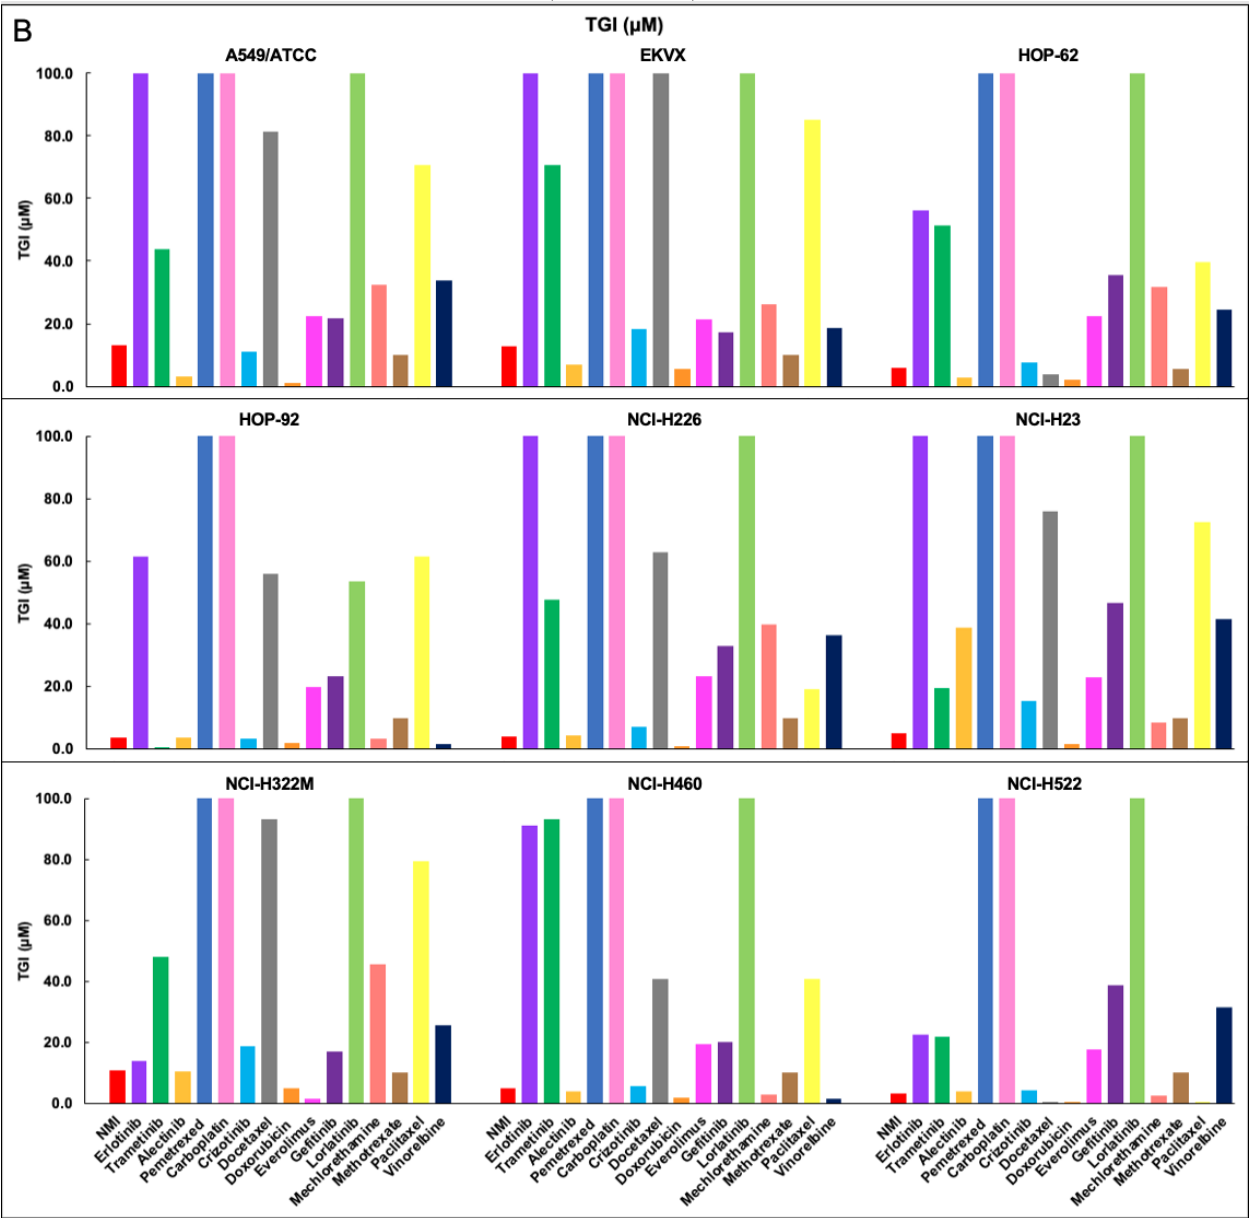

(Continued)



(Continued)

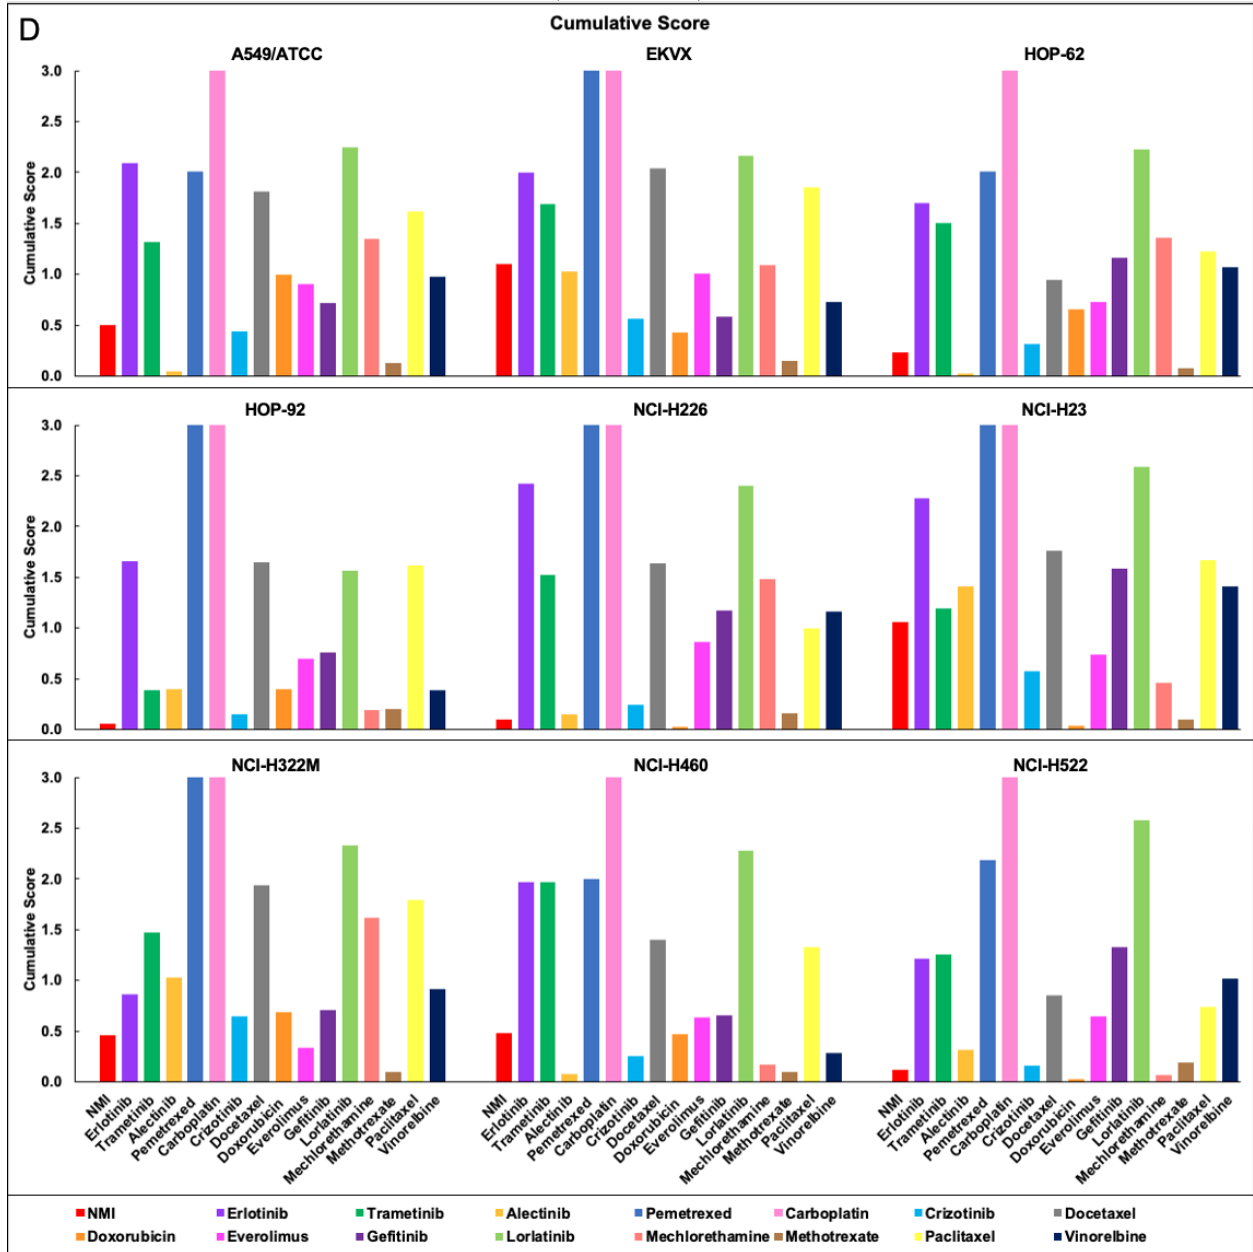

**Figure S2** The comparison of (A)  $GI_{50}$ , (B) TGI, (C)  $LC_{50}$ , (D) cumulative score of NMI to FDA-approved NSCLC drugs. NMI shows higher potency to NSCLC cell lines than most FDA-approved NSCLC cancer drugs. Y-axis indicates concentration of  $GI_{50}$ , TGI,  $LC_{50}$  (0  $\mu$ M to 100  $\mu$ M), and cumulative score (0.0 to 3.0). Drugs are color-coded: NMI (red); Erlotinib (purple); Trametinib (green); Alectinib (yellow); Pemetrexed (blue); Carboplatin (pink); Crizotinib (cyan); Docetaxel (grey); Doxorubicin (orange); Everolimus (magenta); Gefitinib (dark purple); Lorlatinib (light green); Mechlorethamine (light red); Methotrexate (brown); Paclitaxel (yellow-green); Vinorelbine (dark blue).

**Table S3.** The COMPARE results between NMI and FDA-approved CNS cancer, prostate cancer, and NSCLC drugs. All PCC values lower than 0.8, NMI has unique mechanisms than FDA-approved CNS, prostate, and NSCLC cancer drugs. Table of COMPARE results of Figure 5 and Figure S3. Exact values generated by COMPARE algorithm are provided.



| CNS Cancer                 |        |                      |                      |                      |
|----------------------------|--------|----------------------|----------------------|----------------------|
| Drug                       | NSC    | PCC-GI50             | PCC-TGI              | PCC-LC50             |
| Temozolomide               | 362856 | 0.00                 | -0.08                | No data (StdDev = 0) |
| Lomustine                  | 79037  | 0.48                 | 0.04                 | 0.23                 |
| Carmustine                 | 409962 | 0.31                 | -0.04                | 0.27                 |
| Everolimus                 | 733504 | 0.02                 | 0.13                 | 0.51                 |
| Prostate Cancer            |        |                      |                      |                      |
| Drug                       | NSC    | PCC-GI50             | PCC-TGI              | PCC-LC50             |
| Rucaparib                  | 756644 | No data              | No data              | No data              |
| Enzalutamide               | 755605 | -0.15                | 0.38                 | 0.29                 |
| Abiraterone Acetate        | 749227 | 0.07                 | 0.14                 | 0.17                 |
| Cabazitaxel                | 761432 | 0.13                 | 0.11                 | 0.24                 |
| Docetaxel                  | 628503 | 0.26                 | 0.19                 | 0.15                 |
| Leuprolide Acetate         | 746847 | 0.41                 | No data (StdDev = 0) | No data (StdDev = 0) |
| Mitoxantrone               | 758450 | 0.25                 | 0.24                 | 0.42                 |
| Olaparib                   | 753686 | 0.09                 | 0.07                 | No data (StdDev = 0) |
| Non-Small Cell Lung Cancer |        |                      |                      |                      |
| Drug                       | NSC    | PCC-GI50             | PCC-TGI              | PCC-LC50             |
| Erlotinib                  | 718781 | -0.27                | 0.09                 | 0.03                 |
| Trametinib                 | 758246 | -0.14                | 0.26                 | 0.32                 |
| Alectinib                  | 764040 | 0.23                 | 0.15                 | 0.21                 |
| Pemetrexed                 | 755384 | 0.03                 | No data (StdDev = 0) | No data (StdDev = 0) |
| Carboplatin                | 241240 | No data (StdDev = 0) | No data (StdDev = 0) | No data (StdDev = 0) |
| Crizotinib                 | 756645 | 0.44                 | 0.46                 | 0.34                 |
| Docetaxel                  | 628503 | 0.26                 | 0.19                 | 0.15                 |
| Doxorubicin                | 123127 | 0.58                 | 0.37                 | 0.45                 |
| Everolimus                 | 733504 | 0.02                 | 0.13                 | 0.51                 |
| Gefitinib                  | 715055 | -0.04                | 0.03                 | 0.22                 |
| Lorlatinib                 | 780108 | 0.1                  | 0.01                 | No data (StdDev = 0) |
| Mechlorethamine            | 762    | 0.06                 | 0.25                 | 0.34                 |
| Methotrexate               | 740    | -0.01                | 0.06                 | No data (StdDev = 0) |
| Paclitaxel                 | 125973 | 0.38                 | 0.24                 | 0.44                 |
| Vinorelbine                | 608210 | 0.59                 | 0.16                 | 0.24                 |

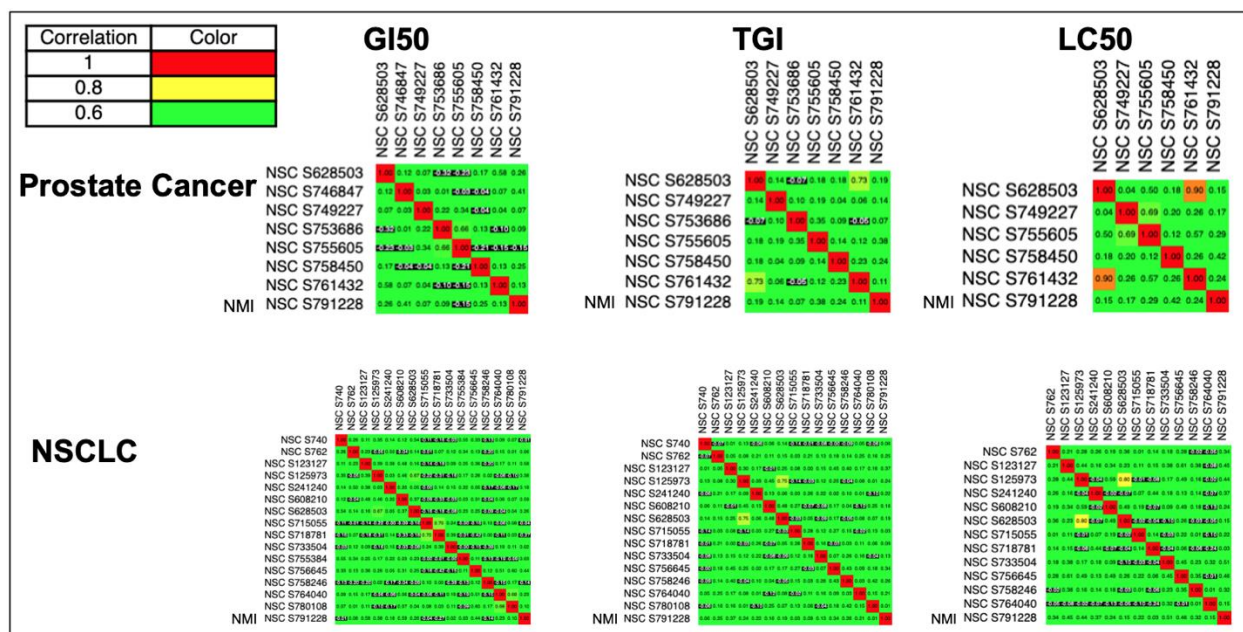

**Figure S3.** Comparison of the mechanism of NMI to FDA-approved prostate cancer and NSCLC drugs by COMPARE plots. NMI has unique mechanism compared to FDA-approved prostate and NSCLC cancer drugs. High PCC (Pearson Pairwise correlation coefficient), > 0.8 shown in yellow (0.8), orange (0.6), or red (0.4) in the matrix COMPARE figure, indicates these 2 drugs have similar mechanisms for cancer therapy.

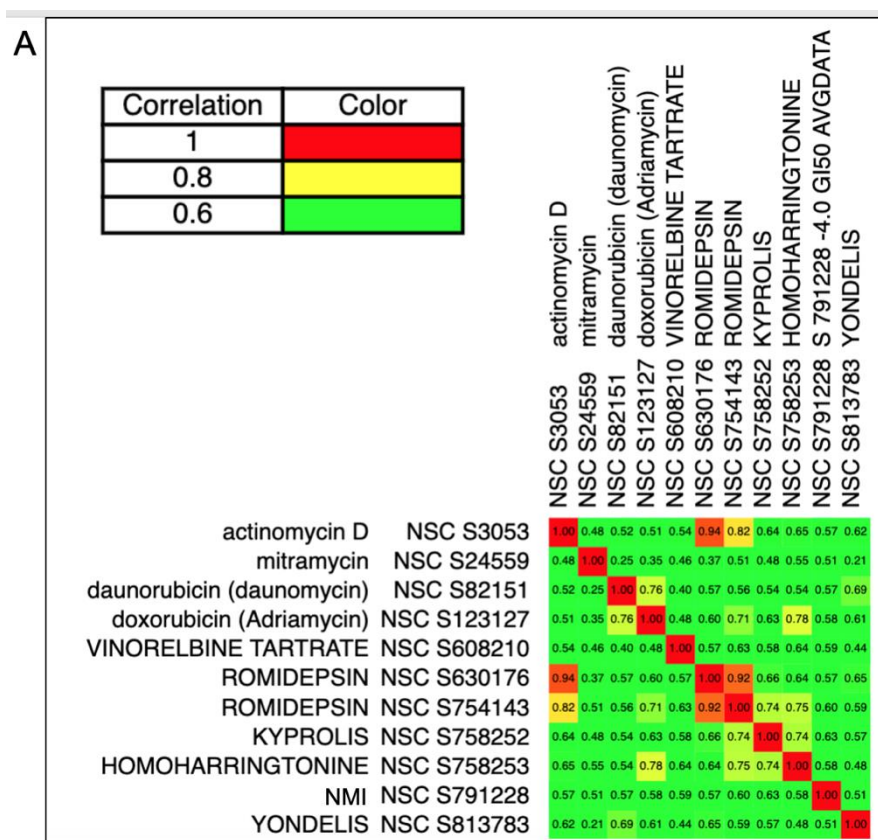

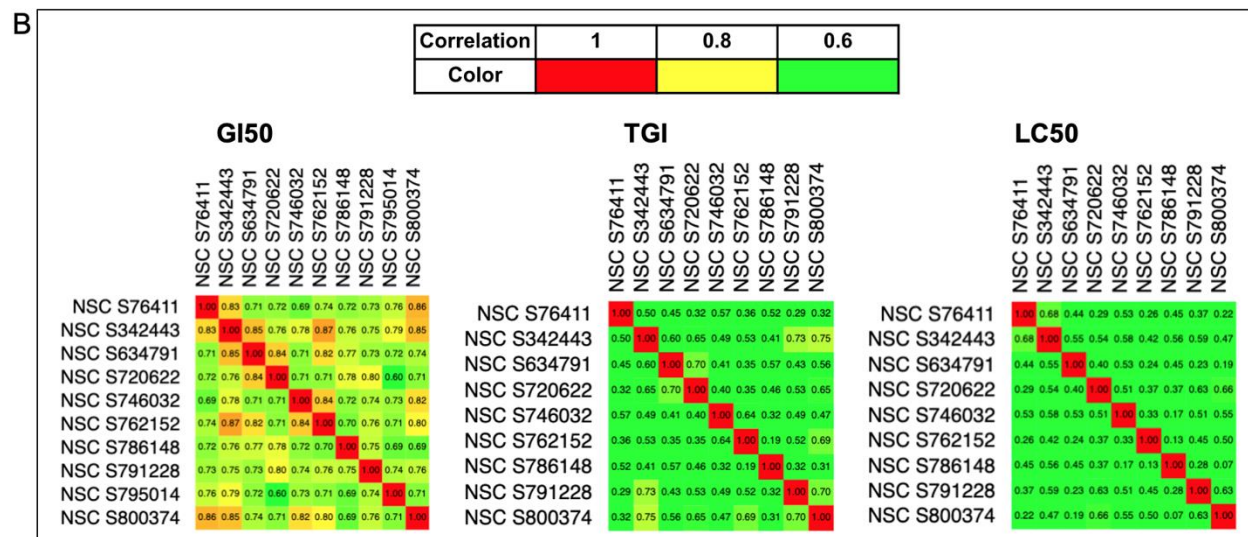

**Figure S4.** COMPARE plots of NMI (NSC 791228) to (A) marketed, (B) unmarked drugs in all cancers (top 10) PCC were shown. The result showed NMI has unique mechanism compared to all marketed anti-cancer drugs ; NMI might have similar mechanism with some unmarked drugs. The Pairwise Pearson Correlation Coefficient (PCC) was determined by searching PUBLIC COMPARE Web Site Navigation for all marketed or unmarked drugs in all different cancers in NCI60 database.

**Table S4.** Table of the COMPARE results of Figure S4A, with the drug names and their mechanisms.

| NSC No. | Drug Name              | PCC-GI50 | Mechanism of Action                           |
|---------|------------------------|----------|-----------------------------------------------|
| 758252  | Carfilzomib (Kyprolis) | 0.63     | Selective Proteasome Inhibitor                |
| 754143  | Romidepsin             | 0.60     | Histone Deacetylase Inhibitor                 |
| 608210  | Vinorelbine Tartrate   | 0.59     | Antimicrotubular Antineoplastic Agent         |
| 123127  | Doxorubicin            | 0.58     | Topoisomerase Inhibitor                       |
| 758253  | Homoharringtonine      | 0.58     | Protein Synthesis Inhibitor                   |
| 3053    | Actinomycin D          | 0.57     | Transcription Inhibitor                       |
| 82151   | Daunorubicin           | 0.57     | Topoisomerase Inhibitor                       |
| 630176  | Romidepsin             | 0.57     | Histone Deacetylase Inhibitor                 |
| 24559   | Mitramycin             | 0.51     | RNA Synthesis Inhibitor                       |
| 813783  | Trabectedin (Yondelis) | 0.51     | Alkylating Drug                               |
| 791228  | NMI                    | 1.00     | MAO A Inhibition; HIF1 $\alpha$ Stabilization |
